# Supplementary material for: Characterization of Porcine Urinary Bladder Matrix Hydrogels from Sodium Dodecyl Sulfate Decellularization Method
Source: PubMed Central journal article supplement (PMC7766358; doi:10.3390/polym12123007), 2020-12-16
Supplement: polymers-12-03007-s001.pdf [file polymers-12-03007-s001.pdf]

Supplementary Materials

# Characterization of Porcine Urinary Bladder Matrix Hydrogels from Sodium Dodecyl Sulfate Decellularization Method

Chen-Yu Kao <sup>1,2,\*</sup>, Huynh-Quang-Dieu Nguyen <sup>1,3</sup> and Yu-Chuan Weng <sup>4</sup>

<sup>1</sup> Graduate Institute of Biomedical Engineering, National Taiwan University of Science and Technology, Taipei 10607, Taiwan

<sup>2</sup> Biomedical Engineering Research Center, National Defense Medical Center, Taipei 11490, Taiwan

<sup>3</sup> Graduate Institute of Applied Science and Technology, National Taiwan University of Science and Technology, Taipei 10607, Taiwan; d10822805@mail.ntust.edu.tw

<sup>4</sup> School of Medicine, National Defense Medical Center, Taipei 11490, Taiwan; 407010125@mail.ndmctsg.gh.edu.tw

\* Correspondence: ckao@mail.ntust.edu.tw; Tel.: +886-2-2730-3676; Fax: +886-2-2730-3733

Received: 3 December 2020; Accepted: 15 December 2020; Published: date

The following are available online at [www.mdpi.com/xxx/s1](http://www.mdpi.com/xxx/s1): Figure S1: SDS residual inside the decellularized scaffold. Table S1: Turbidimetric analysis of the UBM hydrogel gelation kinetics, using PAA decellularization method. Table S2: Turbidimetric analysis of the UBM hydrogel gelation kinetics, using SDS decellularization method. Table S3: Constants from the viscosity measurements of pre-gel solutions from PAA group. Table S4: Constants from the viscosity measurements of pre-gel solutions from SDS group.

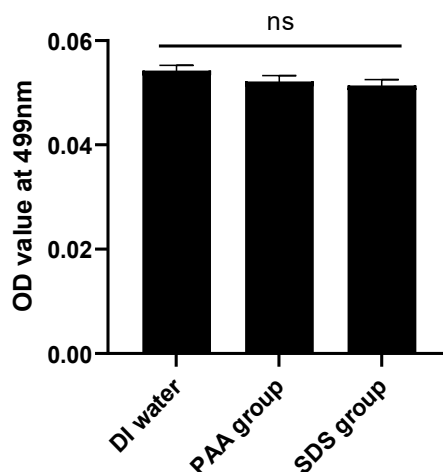

**Figure S1.** SDS residual inside the decellularized scaffold ( $n = 3$ ). \* Denotes a statistically significant difference.

**Table S1.** Turbidimetric analysis of the UBM hydrogel gelation kinetics, using PAA decellularization method ( $n = 4$ ).

| Hydrogel Concentration | Speed ( $\text{min}^{-1}$ ) | $T_{\text{lag}}$ (min) | $T_{1/2}$ (min)      |
|------------------------|-----------------------------|------------------------|----------------------|
| 2 mg/mL                | 0.062 ( $\pm 0.005$ )       | 10.72 ( $\pm 0.57$ )   | 18.69 ( $\pm 1.38$ ) |
| 4 mg/mL                | 0.063 ( $\pm 0.003$ )       | 10.97 ( $\pm 0.58$ )   | 18.80 ( $\pm 1.01$ ) |
| 6 mg/mL                | 0.057 ( $\pm 0.002$ )       | 12.49 ( $\pm 0.60$ )   | 21.78 ( $\pm 0.40$ ) |
| 8 mg/mL                | 0.045 ( $\pm 0.007$ )       | 12.64 ( $\pm 0.19$ )   | 23.86 ( $\pm 0.64$ ) |

**Table S2.** Turbidimetric analysis of the UBM hydrogel gelation kinetics, using SDS decellularization method ( $n = 4$ ).

| Hydrogel Concentration | Speed ( $\text{min}^{-1}$ ) | $T_{\text{lag}}$ (min) | $T_{1/2}$ (min)      |
|------------------------|-----------------------------|------------------------|----------------------|
| 2 mg/mL                | 0.042 ( $\pm 0.008$ )       | 13.88 ( $\pm 0.80$ )   | 27.19 ( $\pm 2.25$ ) |
| 4 mg/mL                | 0.042 ( $\pm 0.009$ )       | 15.26 ( $\pm 1.11$ )   | 27.43 ( $\pm 2.60$ ) |
| 6 mg/mL                | 0.032 ( $\pm 0.002$ )       | 17.12 ( $\pm 0.58$ )   | 32.23 ( $\pm 0.35$ ) |
| 8 mg/mL                | 0.026 ( $\pm 0.002$ )       | 19.62 ( $\pm 0.80$ )   | 38.14 ( $\pm 1.14$ ) |

**Table S3.** Constants from the viscosity measurements of pre-gel solutions from PAA group ( $n = 3$ ).

| Concentration (mg/mL) | $k$                 | $n$                  | $r^2$               |
|-----------------------|---------------------|----------------------|---------------------|
| 4                     | $0.1521 \pm 0.1154$ | $-0.3590 \pm 0.0078$ | $0.9925 \pm 0$      |
| 6                     | $1.4717 \pm 0.0335$ | $-0.5477 \pm 0.005$  | $0.9991 \pm 0.0002$ |
| 8                     | $4.9812 \pm 0.0584$ | $-0.6740 \pm 0.002$  | $0.9997 \pm 0$      |

**Table 4.** Constants from the viscosity measurements of pre-gel solutions from SDS group ( $n = 3$ ).

| Concentration (mg/mL) | $k$                 | $n$                  | $r^2$               |
|-----------------------|---------------------|----------------------|---------------------|
| 4                     | $0.6704 \pm 0.0258$ | $-0.5267 \pm 0.0075$ | $0.9994 \pm 0.0002$ |
| 6                     | $2.2318 \pm 0.0921$ | $-0.623 \pm 0.0052$  | $0.9999 \pm 0.0001$ |
| 8                     | $5.3492 \pm 0.4491$ | $-0.7 \pm 0.0085$    | $0.9998 \pm 0.0002$ |

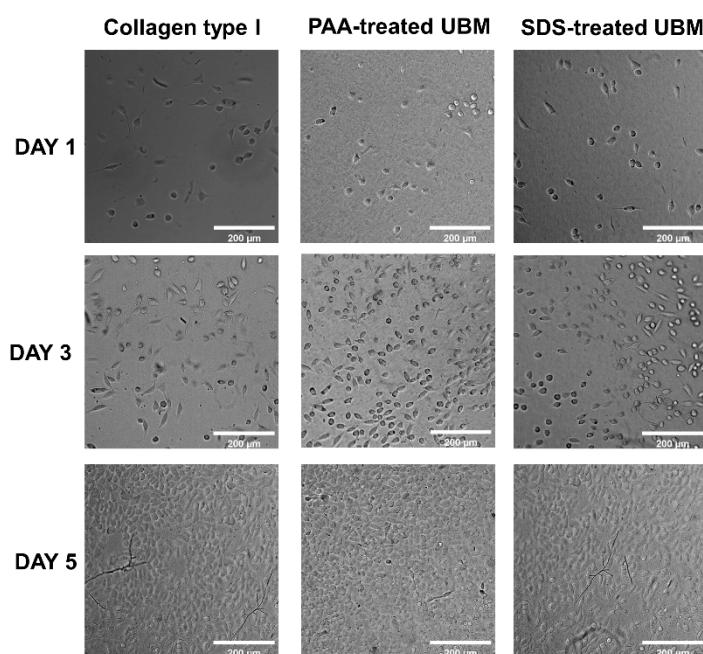**Figure S2.** Optical images of cells cultured on hydrogel surface after 1, 3 and 5 days (scale bar: 200  $\mu\text{m}$ ).

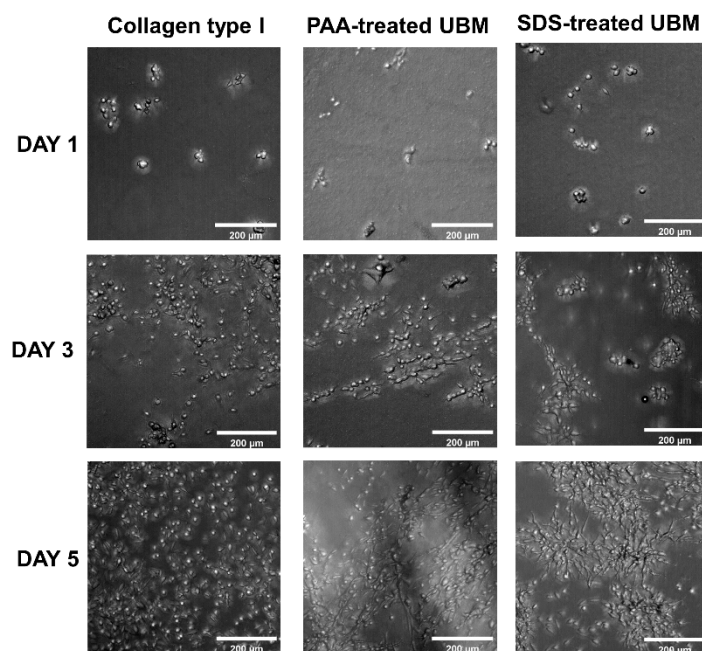

**Figure S3.** Optical images of cells cultured within hydrogel after 1, 3 and 5 days (scale bar: 200 μm).

**Publisher's Note:** MDPI stays neutral with regard to jurisdictional claims in published maps and institutional affiliations.

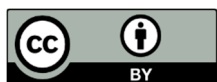

© 2020 by the authors. Submitted for possible open access publication under the terms and conditions of the Creative Commons Attribution (CC BY) license (<http://creativecommons.org/licenses/by/4.0/>).
